# Supplementary material for: Gene signature based on B cell predicts clinical outcome of radiotherapy and immunotherapy for patients with lung adenocarcinoma
Source: PubMed Central journal article supplement (PMC7774727; doi:10.1002/cam4.3561), 2020-10-24
Supplement: CAM4-9-9581-s001.pdf [file CAM4-9-9581-s001.pdf]

# Support Information (Figure)

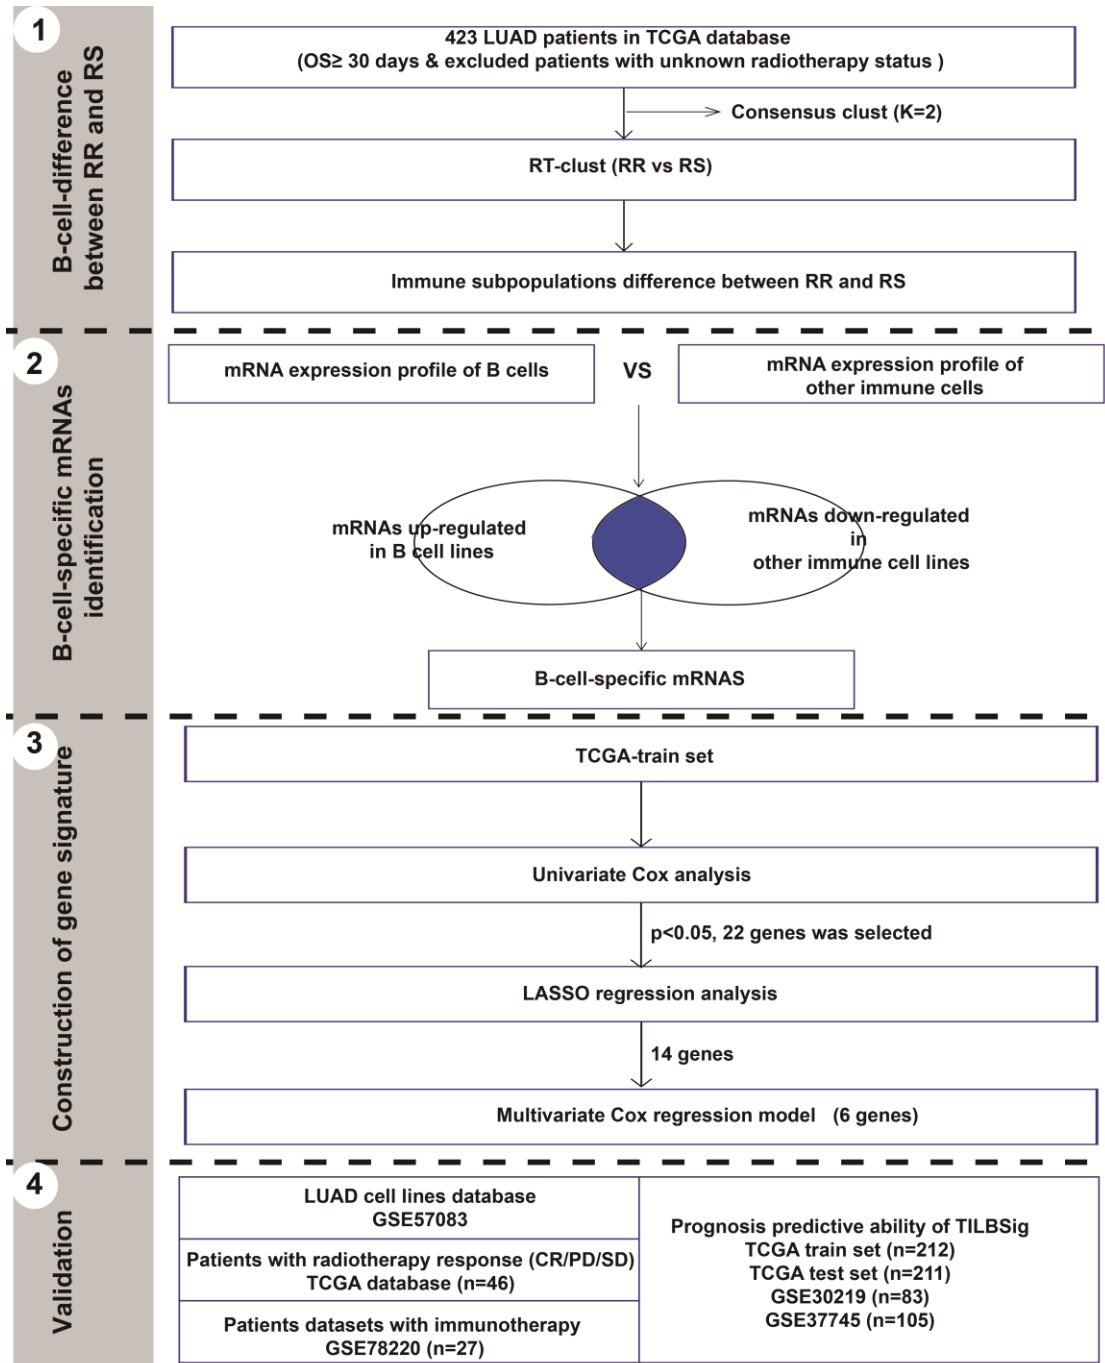

**FIGURE S1** The flow chart of the study.

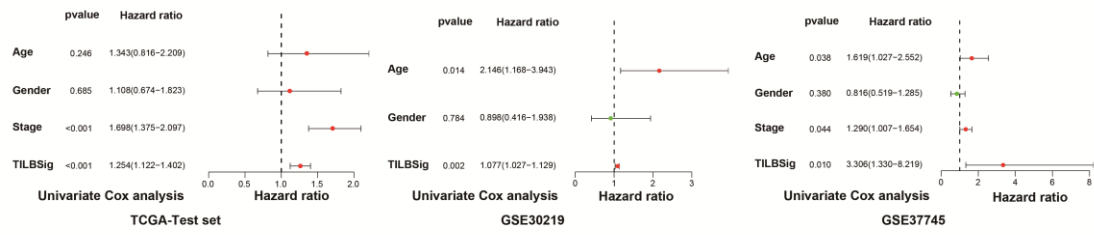

**FIGURE S2** Univariate Cox analysis of the TILBSig and clinicopathological factors in TCGA testing set, GSE30219 and GSE37745 cohort.
